# Supplementary material for: Baseline-dependent effects of amphetamine on attention are associated with striatal dopamine metabolism
Source: PubMed Central journal article supplement (PMC5428442; doi:10.1038/s41598-017-00437-9), 2017-03-22
Supplement: 41598_2017_437_MOESM1_ESM.pdf [file 41598_2017_437_MOESM1_ESM.pdf]

# **Baseline-dependent effects of amphetamine on attention are associated with striatal dopamine metabolism**

Karly M. Turner<sup>1</sup>, BSc (Hons), BA, PhD  
James Peak<sup>1</sup>, BSc (Hons)  
Thomas H. J. Burne<sup>1,2\*</sup> BRurSc (Hons), PhD

1. Queensland Brain Institute, The University of Queensland, St Lucia, QLD 4072, Australia
2. Queensland Centre for Mental Health Research, The Park Centre for Mental Health, Richlands, QLD 4077, Australia

## **\*Address for correspondence**

Assoc. Prof. Thomas Burne  
Queensland Brain Institute  
The University of Queensland,  
St Lucia, Qld 4072  
Australia.  
Email: [t.burne@uq.edu.au](mailto:t.burne@uq.edu.au)  
Fax: +617 3346 6301  
Phone: + 61 7 3346 6371

## **Supplementary Files:**

**Supplementary Table 1:** Relative ratios of selected monoamines in the PFC and CPU of low and high performing rats

**Supplementary Figure 1:** Catecholamine levels in the prefrontal cortex (PFC) of low and high performing rats

**Supplementary Table 1.** Relative ratios of selected monoamines in the PFC and CPU of low and high performing rats

|             | PFC            |                 | CPU            |                 |
|-------------|----------------|-----------------|----------------|-----------------|
|             | Low Performers | High Performers | Low Performers | High Performers |
| DOPAC/DA    | 2.47 +/- 0.33  | 1.91 +/-0.19    | 0.68 +/- 0.07  | 0.72 +/-0.10    |
| HVA/DA      | 1.55+/- 0.18   | 1.42 +/-0.18    | 0.16 +/-0.01   | 0.15 +/-0.02    |
| 5-HIAA/5-HT | 8.72 +/- 1.30  | 6.71 +/- 0.73   | 7.12 +/- 0.54  | 7.19 +/- 0.52   |

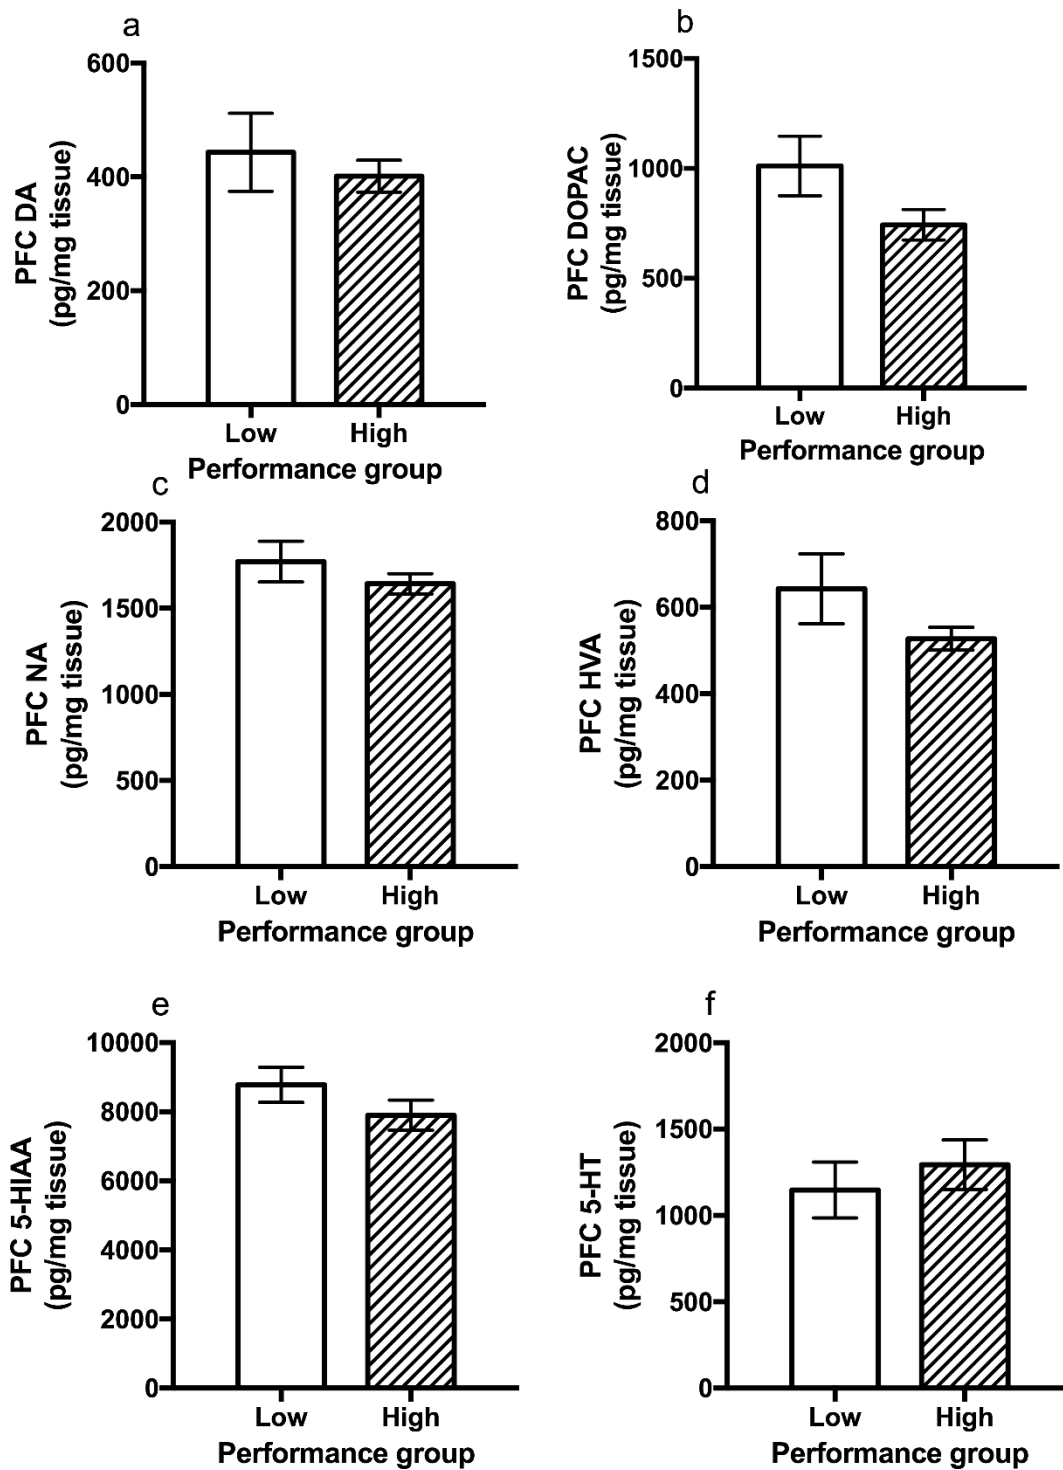

**Supplementary Figure 1.** Catecholamine levels in the prefrontal cortex (PFC) of low and high performing rats. There were no significant differences between performance groups for (a) dopamine (DA), (b) dihydroxyphenyl acetic acid (DOPAC) or (c) noradrenaline (NA), (d) homovanillic acid (HVA), (e) 5-hydroxyindoleacetic acid (5-HIAA) or (f) serotonin (5-HT).
